# Supplementary material
Source: Springer Nature journal article supplement (https://www.springermedizin.de/resource/supplementary/12935_2011_322_MOESM1_ESM.pdf/9540288)

**A**

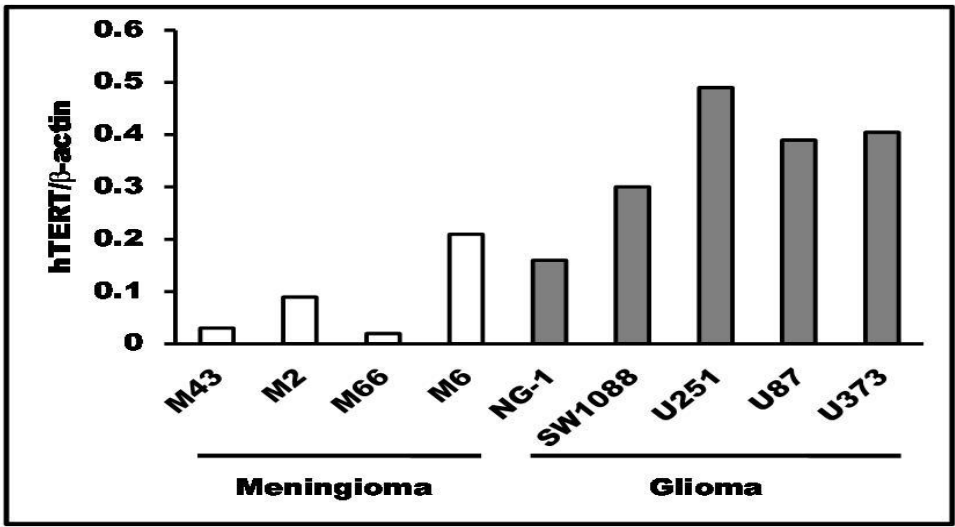

**B-1**

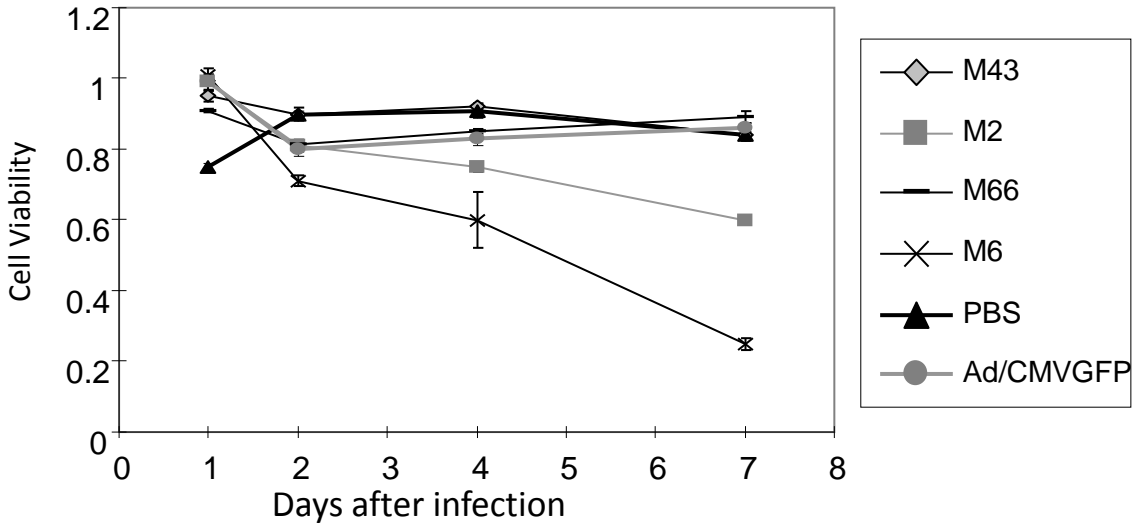

**B-2**

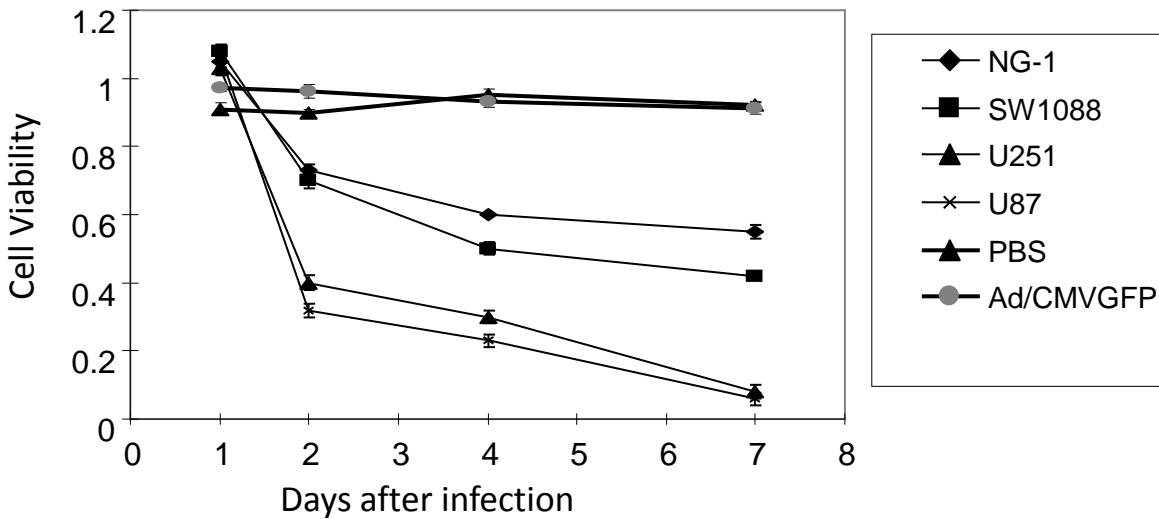

Supplement: MOESM1 [file 9540288]
